# Supplementary material
Source: PubMed Central journal article supplement (PMC3697637)
Supplement: JB.00185-13_zjb999092683so1.pdf [file JB.00185-13_zjb999092683so1.pdf]

## Supplemental Material

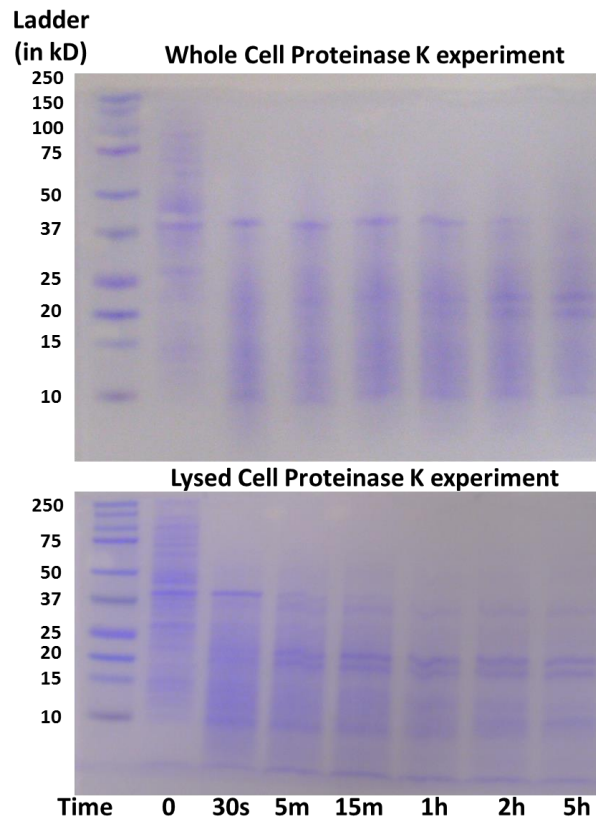

**FIG S1: Coomassie Blue stains of Proteinase K experiment gels.** Proteinase K experiment samples were ran on an SDS-PAGE gel and stained with Coomassie blue. Whole cell samples incubated with Proteinase K (top) show differences from samples lysed prior to Proteinase K addition (bottom).
